# Supplementary material
Source: MDPI journal article supplement (https://www.mdpi.com/1999-4907/13/9/1438)
Supplement: s1 [file s1]

Table S2. Summarised number of individual woody species (dbh  $\geq 10$ cm) in natural forest, coffee forest and coffee agroforest (values are mean  $\pm$  SD) (Test KW test against forest type)

| Species name                   | Natural forest     | Coffee forest     | Coffee agroforest  | p  |
|--------------------------------|--------------------|-------------------|--------------------|----|
| <i>Alangium chinense</i>       | 0.0126 $\pm$ 0.126 | 0.048 $\pm$ 0.378 | 0.0317 $\pm$ 0.252 | ns |
| <i>Albizia gummifera</i>       | 0.048 $\pm$ 0.215  | 0.159 $\pm$ 0.574 | 0.413 $\pm$ 0.835  | ** |
| <i>Allophylus abyssinicus</i>  | 0.270 $\pm$ 0.807  | 0.143 $\pm$ 0.47  | 0.032 $\pm$ 0.178  | ns |
| <i>Apodytes dimidiata</i>      | 0.095 $\pm$ 0.296  | 0.016 $\pm$ 0.126 | 0.079 $\pm$ 0.326  | ns |
| <i>Bersama abyssinica</i>      | 0.095 $\pm$ 0.272  | 0.302 $\pm$ 0.978 | 0.159 $\pm$ 0.368  | ns |
| <i>Cassipourea malosana</i>    | 0.032 $\pm$ 0.176  | 0.032 $\pm$ 0.177 | 0.016 $\pm$ 0.126  | ns |
| <i>Celtis africana</i>         | 0.508 $\pm$ 0.896  | 0.429 $\pm$ 0.893 | 0.317 $\pm$ 0.714  | ns |
| <i>Chionanthus mildbraedii</i> | 1.413 $\pm$ 1.540  | 1.302 $\pm$ 1.7   | 0.063 $\pm$ 0.215  | ** |
| <i>Clausena anisata</i>        | 0                  | 0.063 $\pm$ 0.246 | 0.063 $\pm$ 0.304  | ns |
| <i>Cordia africana</i>         | 0.127 $\pm$ 0.458  | 0.571 $\pm$ 0.962 | 1.048 $\pm$ 1.507  | ** |
| <i>Croton macrostachyus</i>    | 0.429 $\pm$ 0.817  | 0.921 $\pm$ 1.209 | 0.651 $\pm$ 1.05   | ns |
| <i>Diospyros abyssinica</i>    | 2.032 $\pm$ 2.95   | 0.825 $\pm$ 1.314 | 0.349 $\pm$ 0.722  | ** |
| <i>Dombeya torrida</i>         | 0.016 $\pm$ 0.125  | 0.016 $\pm$ 0.126 | 0                  | ns |
| <i>Dracaena afromontana</i>    | 0.476 $\pm$ 0.997  | 0.238 $\pm$ 0.665 | 0.048 $\pm$ 0.28   | ** |
| <i>Dracaena steudneri</i>      | 0.317 $\pm$ 1.105  | 0.286 $\pm$ 0.812 | 0.079 $\pm$ 0.272  | ns |
| <i>Ehretia cymosa</i>          | 0.190 $\pm$ 0.692  | 0.397 $\pm$ 0.925 | 0.063 $\pm$ 0.396  | ** |
| <i>Ekebergia capensis</i>      | 0.016 $\pm$ 0.126  | 0                 | 0.048 $\pm$ 0.215  | ns |
| <i>Erythrococca trichogyne</i> | 0.016 $\pm$ 0.126  | 0                 | 0                  | ns |
| <i>Euphorbia candelabrum</i>   | 0                  | 0.571 $\pm$ 0.962 | 1.048 $\pm$ 0.28   | ns |
| <i>Fagaropsis angolensis</i>   | 0.175 $\pm$ 0.383  | 0.302 $\pm$ 0.663 | 0.190 $\pm$ 0.618  | ns |
| <i>Ficus vasta</i>             | 0.0159 $\pm$ 0.126 | 0                 | 0                  | ns |
| <i>Ficus ovata</i>             | 0.079 $\pm$ 0.326  | 0.063 $\pm$ 0.245 | 0                  | ns |
| <i>Ficus sur</i>               | 0.043 $\pm$ 0.712  | 0.127 $\pm$ 0.380 | 0.018 $\pm$ 0.383  | ** |
| <i>Flacourtia indica</i>       | 0.063 $\pm$ 0.304  | 0.111 $\pm$ 0.057 | 0.079 $\pm$ 0.326  | ns |
| <i>Galiniera saxifrage</i>     | 0.174 $\pm$ 0.555  | 0.175 $\pm$ 0.708 | 0.032 $\pm$ 0.177  | ns |
| <i>Ilex mitis</i>              | 0.349 $\pm$ 0.849  | 0.143 $\pm$ 0.563 | 0.016 $\pm$ 0.126  | ** |
| <i>Macaranga capensis</i>      | 0.317 $\pm$ 0.947  | 0.365 $\pm$ 1.195 | 0.063 $\pm$ 0.246  | ns |
| <i>Maesa lanceolata</i>        | 0                  | 0.032 $\pm$ 0.177 | 0.079 $\pm$ 0.326  | ns |
| <i>Maytenus arbutifolia</i>    | 0.159 $\pm$ 0.574  | 0.159 $\pm$ 0.545 | 0.016 $\pm$ 0.126  | ns |
| <i>Milletia ferruginea</i>     | 0.556 $\pm$ 1.478  | 1.667 $\pm$ 2.376 | 1.746 $\pm$ 1.975  | ** |
| <i>Mimusops kummel</i>         | 0.413 $\pm$ 0.978  | 0.175 $\pm$ 0.555 | 0.048 $\pm$ 0.280  | *  |

Table S2. continued----

| Species name                       | Natural forest | Coffee forest | Coffee agroforest | <i>p</i> |
|------------------------------------|----------------|---------------|-------------------|----------|
| <i>Olea welwitschii</i>            | 0.571 ± 0.837  | 0.762 ± 1.201 | 0.317 ± 1.013     | **       |
| <i>Oxyanthus speciosus</i>         | 0.857 ± 1.216  | 0.429 ± 0.995 | 0.0476 ± 0.280    | **       |
| <i>Persea americana</i>            | 0              | 0             | 0.016 ± 0.126     | ns       |
| <i>Phoenix reclinata</i>           | 0.254 ± 0.782  | 0.317 ± 1.401 | 0.048 ± 0.215     | ns       |
| <i>Pittosporum viridiflorum</i>    | 0.0635 ± 0.304 | 0.127 ± 0.889 | 0.0159 ± 0.126    | ns       |
| <i>Polyscia fulva</i>              | 0.349 ± 0.572  | 0.286 ± 0.580 | 0.143 ± 0.470     | *        |
| <i>Pouteria adolfi-friederici</i>  | 0.682 ± 1.342  | 0.540 ± 1.293 | 0.286 ± 0.580     | ns       |
| <i>Premna schimperi</i>            | 0.016 ± 0.126  | 0.016 ± 0.126 | 0                 | ns       |
| <i>Prunus africana</i>             | 0.127 ± 0.336  | 0.111 ± 0.406 | 0.222 ± 0.659     | ns       |
| <i>Rhus natalensis</i>             | 0              | 0.016 ± 0.126 | 0.016 ± 0.126     | ns       |
| <i>Rothmannia urcelliformis</i>    | 0.397 ± 0.661  | 0.571 ± 1.160 | 0.095 ± 0.296     | **       |
| <i>Rytigynia neglecta</i>          | 0.159 ± 0.515  | 0.175 ± 0.383 | 0.0317 ± 0.177    | *        |
| <i>Sapium ellipticum</i>           | 0.095 ± 0.346  | 0.111 ± 0.542 | 0.079 ± 0.326     | ns       |
| <i>Schefflera abyssinica</i>       | 0.333 ± 0.718  | 0.270 ± 0.545 | 0.079 ± 0.272     | *        |
| <i>Schrebera alata</i>             | 0.016 ± 0.126  | 0.016 ± 0.126 | 0.016 ± 0.126     | ns       |
| <i>Syzygium guineense</i>          | 0.730 ± 1.153  | 0.523 ± 0.998 | 0.413 ± 0.775     | ns       |
| <i>Teclea nobilis</i>              | 0.349 ± 1.065  | 0.286 ± 0.906 | 0.032 ± 0.177     | *        |
| <i>Trichilia dregeana</i>          | 0.111 ± 0.364  | 0.111 ± 0.316 | 0.190 ± 0.535     | ns       |
| <i>Trilepisium madagascariense</i> | 0.810 ± 2.12   | 0.333 ± 1.092 | 0.048 ± 0.28      | **       |
| <i>Vangueria apiculata</i>         | 0.016 ± 0.126  | 0.111 ± 0.444 | 0.048 ± 0.215     | ns       |
| <i>Vepris dainellii</i>            | 0.587 ± 0.835  | 0.714 ± 1.142 | 0.048 ± 0.215     | **       |
| <i>Vernonia amygdalina</i>         | 0.095 ± 0.39   | 0.222 ± 0.75  | 0.111 ± 0.542     | ns       |

\* = significant ( $p < 0.05$ )\*\* = significant ( $p < 0.01$ )- ns = non significant ( $p > 0.05$ )
