# Supplementary material
Source: MDPI journal article supplement (https://www.mdpi.com/1999-4907/13/9/1438)
Supplement: s1 [file s1]

Table S3. Result of Similarity Percentage (SIMPER) of woody species between natural forest (NF), coffee forest (FC) and coffee agroforest (CAF). For each species the average dissimilarity between natural forest, coffee forest and coffee agroforest, and its percentage contribution to the overall variation in species composition between them is also indicated.

|    |                                | NF Vs. FC (Dissim= 54.19%) |            | FC vs. CAF (Dissim= 76.67%) |            | NF vs. CAF (Dissim= 62.9%) |            |
|----|--------------------------------|----------------------------|------------|-----------------------------|------------|----------------------------|------------|
|    | Species name                   | Av. dissim                 | Contrib. % | Av. dissim                  | Contrib. % | Av. dissim                 | Contrib. % |
| 1  | <i>Alangium chinense</i>       | 0.14                       | 0.26       | 0.11                        | 0.15       | 5.36                       | 8.53       |
| 2  | <i>Albizia gummifera</i>       | 0.42                       | 0.77       | 1.74                        | 2.27       | 4.58                       | 7.29       |
| 3  | <i>Allophylus abyssinicus</i>  | 1.56                       | 2.88       | 2.016                       | 2.63       | 4.20                       | 6.68       |
| 4  | <i>Apodytes dimidiata</i>      | 0.23                       | 0.43       | 0.33                        | 0.43       | 2.86                       | 4.54       |
| 5  | <i>Bersama abyssinica</i>      | 0.77                       | 1.41       | 0.59                        | 0.77       | 2.79                       | 4.43       |
| 6  | <i>Cassipourea malosana</i>    | 0.17                       | 0.32       | 0.16                        | 0.21       | 2.59                       | 4.12       |
| 7  | <i>Celtis africana</i>         | 1.26                       | 2.32       | 1.84                        | 2.40       | 2.43                       | 3.86       |
| 8  | <i>Chionanthus mildbraedii</i> | 2.28                       | 4.21       | 5.21                        | 6.80       | 2.19                       | 3.48       |
| 9  | <i>Clausena anisata</i>        | 0.21                       | 0.39       | 0.19                        | 0.24       | 2.11                       | 3.36       |
| 10 | <i>Cordia africana</i>         | 1.49                       | 2.75       | 4.68                        | 6.10       | 2.03                       | 3.23       |
| 11 | <i>Croton macrostachyus</i>    | 1.89                       | 3.48       | 2.20                        | 2.88       | 1.82                       | 2.89       |
| 12 | <i>Diospyros abyssinica</i>    | 3.84                       | 7.09       | 6.07                        | 7.92       | 1.71                       | 2.72       |
| 13 | <i>Dombeya torrida</i>         | 0.09                       | 0.16       | 0.07                        | 0.09       | 1.71                       | 2.72       |
| 14 | <i>Dracaena afromontana</i>    | 2.57                       | 4.74       | 3.30                        | 4.31       | 1.68                       | 2.68       |
| 15 | <i>Dracaena steudneri</i>      | 3.72                       | 6.86       | 4.31                        | 5.62       | 1.61                       | 2.56       |
| 16 | <i>Ehretia cymosa</i>          | 2.38                       | 4.40       | 2.82                        | 3.67       | 1.51                       | 2.40       |
| 17 | <i>Ekebergia capensis</i>      | 0.05                       | 0.09       | 0.16                        | 0.20       | 1.48                       | 2.35       |
| 18 | <i>Erythrococca trichogyne</i> | 0.05                       | 0.09       | 0.07                        | 0.09       | 1.19                       | 1.88       |
| 19 | <i>Euphorbia candelabrum</i>   | 0.06                       | 0.11       | 0.13                        | 0.17       | 1.18                       | 1.88       |
| 20 | <i>Fagaropsis angolensis</i>   | 0.83                       | 1.53       | 0.92                        | 1.20       | 1.14                       | 1.82       |
| 21 | <i>Ficus ovata</i>             | 0.36                       | 0.67       | 0.40                        | 0.52       | 1.12                       | 1.79       |
| 22 | <i>Ficus sur</i>               | 1.32                       | 2.44       | 1.74                        | 2.26       | 1.10                       | 1.76       |
| 23 | <i>Ficus vasta</i>             | 0.05                       | 0.09       | 0.07                        | 0.09       | 1.04                       | 1.66       |
| 24 | <i>Flacourtia indica</i>       | 0.39                       | 0.72       | 0.34                        | 0.45       | 1.02                       | 1.62       |
| 25 | <i>Galiniera saxifrage</i>     | 0.58                       | 1.08       | 1.05                        | 1.37       | 1.02                       | 1.62       |
| 26 | <i>Ilex mitis</i>              | 1.09                       | 2.01       | 1.22                        | 1.59       | 0.99                       | 1.58       |
| 27 | <i>Macaranga capensis</i>      | 1.31                       | 2.42       | 1.09                        | 1.42       | 0.96                       | 1.52       |

Table S3. Continued-----

|    |                                    | NF Vs. FC<br>(Dissim=54.19<br>%)    | FC vs. CAF<br>(Dissim=76.67<br>%)   | NF vs. CAF<br>(Dissim=62.9<br>%)    |
|----|------------------------------------|-------------------------------------|-------------------------------------|-------------------------------------|
|    | Species name                       | Av. di<br>ssi<br>m<br>Contrib.<br>% | Av. di<br>ssi<br>m<br>Contrib.<br>% | Av. di<br>ssi<br>m<br>Contrib.<br>% |
| 28 | <i>Maesa lanceolata</i>            | 0.10                                | 0.19                                | 0.24                                |
| 29 | <i>Maytenus arbutifolia</i>        | 0.51                                | 0.93                                | 0.55                                |
| 30 | <i>Milletia ferruginea</i>         | 3.45                                | 6.46                                | 6.35                                |
| 31 | <i>Mimusops kummel</i>             | 1.923                               | 3.863                               | 0.95                                |
| 32 | <i>Olea welwitschii</i>            | 1.60                                | 2.95                                | 1.81                                |
| 33 | <i>Oxyanthus speciosus</i>         | 1.82                                | 3.36                                | 3.03                                |
| 34 | <i>Persea americana</i>            | 0                                   | 0                                   | 0.05                                |
| 35 | <i>Phoenix reclinata</i>           | 1.38                                | 2.56                                | 1.56                                |
| 36 | <i>Pittosporum viridiflorum</i>    | 0.53                                | 0.99                                | 0.27                                |
| 37 | <i>Polyscia fulva</i>              | 0.58                                | 1.07                                | 0.94                                |
| 38 | <i>Pouteria adolfi-friederici</i>  | 2.44                                | 4.50                                | 3.06                                |
| 39 | <i>Premna schimperi</i>            | 0.07                                | 0.12                                | 0.04                                |
| 40 | <i>Prunus africana</i>             | 0.39                                | 0.72                                | 0.65                                |
| 41 | <i>Rhus natelensis</i>             | 0.06                                | 0.11                                | 0.04                                |
| 42 | <i>Rothmannia urcelliformis</i>    | 0.95                                | 1.75                                | 1.23                                |
| 43 | <i>Rytigynia neglecta</i>          | 0.49                                | 0.90                                | 0.61                                |
| 44 | <i>Sapium ellipticum</i>           | 0.42                                | 0.78                                | 0.43                                |
| 45 | <i>Schefflera abyssinica</i>       | 0.72                                | 1.34                                | 1.05                                |
| 46 | <i>Schrebera alata</i>             | 0.07                                | 0.14                                | 0.09                                |
| 47 | <i>Syzygium guineense</i>          | 1.80                                | 3.31                                | 2.41                                |
| 48 | <i>Teclea nobilis</i>              | 0.90                                | 1.67                                | 1.12                                |
| 49 | <i>Trichilia dregeana</i>          | 0.44                                | 0.80                                | 0.65                                |
| 50 | <i>Trilepisium madagascariense</i> | 2.61                                | 4.82                                | 3.33                                |
| 51 | <i>Vangueria apiculata</i>         | 0.37                                | 0.69                                | 0.18                                |
| 52 | <i>Vepris dainellii</i>            | 1.11                                | 2.06                                | 2.03                                |
| 53 | <i>Vernonia amygdalina</i>         | 0.54                                | 0.99                                | 0.32                                |
