# Supplementary material
Source: MDPI journal article supplement (https://www.mdpi.com/1999-4907/13/9/1438)
Supplement: s1 [file s1]

Table S1. Summarised list of woody plants recorded in natural forest, coffee forest and coffee agroforest of Belete forest, southwest Ethiopia. The sign "+" shows presence and "-" absence of woody plants

| No | Scientific name                  | Family         | Natural forest | Coffee forest | Coffee agroforest |
|----|----------------------------------|----------------|----------------|---------------|-------------------|
| 1  | <i>Alangium chinense</i>         | Alangiaceae    | +              | +             | +                 |
| 2  | <i>Albizia gummifera</i>         | Fabaceae       | +              | +             | +                 |
| 3  | <i>Allophylus abyssinicus</i>    | Sapindaceae    | +              | +             | +                 |
| 4  | <i>Apodytes dimidiata.</i>       | Icacinaceae    | +              | +             | +                 |
| 5  | <i>Bersama abyssinica</i>        | Melianthaceae  | +              | +             | +                 |
| 6  | <i>Brucea antidysenterica</i>    | Simaroubaceae  | -              | +             | -                 |
| 7  | <i>Calpurnia aurea</i>           | Fabaceae       | +              | +             | +                 |
| 8  | <i>Cassipourea malosana</i>      | Rhizophoraceae | +              | +             | +                 |
| 9  | <i>Celtis africana</i>           | Ulmaceae       | +              | +             | +                 |
| 10 | <i>Chionanthus mildbraedii</i>   | Oleaceae       | +              | +             | +                 |
| 11 | <i>Clausena anisata</i>          | Rutaceae       | +              | +             | +                 |
| 12 | <i>Coffea arabica</i>            | Rubiaceae      | +              | +             | +                 |
| 13 | <i>Cordia africana</i>           | Boraginiaceae  | +              | +             | +                 |
| 14 | <i>Croton macrostachyus</i>      | Euphorbiaceae  | +              | +             | +                 |
| 15 | <i>Diospyros abyssinica</i>      | Ebenaceae      | +              | +             | +                 |
| 16 | <i>Dombeya torrida</i>           | Sterculiaceae  | +              | +             | -                 |
| 17 | <i>Dracaena afromontana</i>      | Dracaenaceae   | +              | +             | +                 |
| 18 | <i>Dracaena steudneri</i>        | Dracaenaceae   | +              | +             | +                 |
| 19 | <i>Ehretia cymosa</i>            | Boraginiaceae  | +              | +             | +                 |
| 20 | <i>Ekebergia capensis</i>        | Meliaceae      | +              | -             | +                 |
| 21 | <i>Erythrococca trichogyne</i>   | Euphorbiaceae  | +              | -             | -                 |
| 22 | <i>Euphorbia candelabrum</i>     | Euphorbiaceae  | -              | +             | +                 |
| 23 | <i>Fagaropsis angolensis</i>     | Rutaceae       | +              | +             | +                 |
| 24 | <i>Ficus ovata</i>               | Moraceae       | +              | +             | -                 |
| 25 | <i>Ficus sur</i>                 | Moraceae       | +              | +             | +                 |
| 26 | <i>Ficus vasta</i>               | Moraceae       | +              | -             | -                 |
| 27 | <i>Flacourtia indica</i>         | Flacourtiaceae | +              | +             | +                 |
| 28 | <i>Galiniera saxifrage</i>       | Rubiaceae      | +              | +             | +                 |
| 29 | <i>Justicia schimperiana</i>     | Acanthaceae    | +              | +             | +                 |
| 30 | <i>Liana</i>                     |                | +              | -             | -                 |
| 31 | <i>Lepidotrichilia volkensii</i> | Meliaceae      | +              | -             | -                 |
| 32 | <i>Manilkara butugi</i>          | Sapotaceae     | -              | -             | +                 |
| 33 | <i>Myrsine africana</i>          | Myrsinaceae    | +              | -             | -                 |
| 34 | <i>Ilex mitis</i>                | Aquifoliaceae  | +              | +             | +                 |
| 35 | <i>Macaranga capensis</i>        | Euphorbiaceae  | +              | +             | +                 |
| 36 | <i>Maesa lanceolata</i>          | Myrsinaceae    | +              | +             | +                 |

Table S1. continued-----

|              | Scientific name                            | Family         | Natural<br>forest | Coffee forest | Coffee agroforest |
|--------------|--------------------------------------------|----------------|-------------------|---------------|-------------------|
| 37           | <i>Maytenus arbutifolia</i>                | Celastraceae   | +                 | +             | +                 |
| 38           | <i>Milletia ferruginea</i>                 | Fabaceae       | +                 | +             | +                 |
| 39           | <i>Mimusops kummel</i>                     | Sapotaceae     | +                 | +             | +                 |
| 40           | <i>Olea welwitschii</i>                    | Oleaceae       | +                 | +             | +                 |
| 41           | <i>Oxyanthus speciosus</i>                 | Rubiaceae      | +                 | +             | +                 |
| 42           | <i>Persea americana</i>                    | Lauraceae      | -                 | -             | +                 |
| 43           | <i>Phoenix reclinata</i>                   | Arecaceae      | +                 | +             | +                 |
| 44           | <i>Pittosporum viridiflorum</i>            | Pittosporaceae | +                 | +             | +                 |
| 45           | <i>Polyscia fulva</i>                      | Araliaceae     | +                 | +             | +                 |
| 46           | <i>Pouteria adolfi-friederici</i>          | Sapotaceae     | +                 | +             | +                 |
| 47           | <i>Premna schimperii</i>                   | Lamiaceae      | +                 | +             | -                 |
| 48           | <i>Prunus africana</i>                     | Rosaceae       | +                 | +             | +                 |
| 49           | <i>Psidium guajava</i>                     | Myrtaceae      | -                 | -             | +                 |
| 50           | <i>Psydrax schimperiana</i>                | Rubiaceae      | +                 | +             | -                 |
| 51           | <i>Rhus natelensis</i>                     | Anacardiaceae  | +                 | +             | -                 |
| 52           | <i>Rothmannia urcelliformis</i>            | Rubiaceae      | +                 | +             | +                 |
| 53           | <i>Rytigynia neglecta</i>                  | Rubiaceae      | +                 | +             | +                 |
| 54           | <i>Sapium ellipticum</i>                   | Euphorbiaceae  | +                 | +             | +                 |
| 55           | <i>Schrebera alata</i>                     | Oleaceae       | +                 | +             | +                 |
| 56           | <i>Schefflera abyssinica</i>               | Araliaceae     | +                 | +             | +                 |
| 57           | <i>Syzygium guineense</i>                  | Myrtaceae      | +                 | +             | +                 |
| 58           | <i>Teclea nobilis</i>                      | Rutaceae       | +                 | +             | +                 |
| 59           | <i>Trichilia dregeana</i>                  | Meliaceae      | +                 | +             | +                 |
| 60           | <i>Trilepisium<br/>    madagascariense</i> | Moraceae       | +                 | +             | +                 |
| 61           | <i>Vangueria apiculata</i>                 | Rubiaceae      | +                 | +             | +                 |
| 62           | <i>Vepris dainellii</i>                    | Rutaceae       | +                 | +             | +                 |
| 63           | <i>Vernonia amygdalina</i>                 | Asteraceae     | -                 | +             | +                 |
| 64           | <i>Vernonia auriculifera</i>               | Asteraceae     | -                 | -             | +                 |
| Total number |                                            | 33             | 57                | 54            | 53                |
